# Supplementary material
Source: PubMed Central journal article supplement (PMC1275588)
Supplement: nar_33_19_6268__1.pdf [file nar_33_19_6268__1.pdf]

**Table S1: Sequences of all oligonucleotides used for making RNA probes, agarose Northern analysis and RT-PCR**

| Oligo name | Sequence 5' to 3'                 | Length (nts) | Used for                                        | Size of product |
|------------|-----------------------------------|--------------|-------------------------------------------------|-----------------|
| ygeH-F     | GAAAGAGTTAGGTGATTAATAGTATTACTTG   | 32           | RNA probe for ygeH antisense RNA                | 375 nts         |
| ygeH-R     | GCCATCGGATAGGTATAGAG              | 20           | RNA probe for ygeH antisense RNA                | 375 nts         |
| rhsE-F     | CAGGGGATAGACAAGGTCAGCCAGC         | 25           | RNA probe for rhsE antisense RNA                | 210 nts         |
| rhsE-R     | CTAATAATTTGAAGCATCTGAAGTCC        | 26           | RNA probe for rhsE antisense RNA                | 210 nts         |
| yfjN-F     | CTCACTGGAGCCAATCGTTCTCTGG         | 25           | RNA probe for yfjN antisense RNA                | 207 nts         |
| yfjN-R     | AATTTTCCACACTACGGTATGAGC          | 24           | RNA probe for yfjN antisense RNA                | 207 nts         |
| yiaO-F     | CGTCTGGTTTTATATTCATTATTAGTCC      | 29           | RNA probe for yiaO antisense RNA                | 278 nts         |
| yiaO-R     | TTAATTTTCAGCTCGCTTTGGTTCTCTCC     | 29           | RNA probe for yiaO antisense RNA                | 278 nts         |
| yjcE-F     | GCCACACGGGAGATCAGCAACGAAACG       | 27           | RNA probe for yjcE antisense RNA                | 198 nts         |
| yjcE-R     | AATTTATTTGTTTTAGAATCATGAATGTTAGC  | 32           | RNA probe for yjcE antisense RNA                | 198 nts         |
| ydiM-F     | GGCACAGTACGGACAATTTGTTGCAGG       | 27           | RNA probe for ydiM antisense RNA                | 265 nts         |
| ydiM-R     | AATTTGCACAACACCTCCAGCAGAGG        | 26           | RNA probe for ydiM antisense RNA                | 265 nts         |
| ecpD-F     | GCGGACATTGTCATTTCCGGTACTCG        | 26           | RNA probe for ecpD antisense RNA                | 215 nts         |
| ecpD-R     | AATTTGATTGTTTCCCACGTTTGG          | 25           | RNA probe for ecpD antisense RNA                | 215 nts         |
| topA-F     | AAAACGCGTTATCTGGCCGATGCGCCAC      | 29           | RNA probe for topA antisense RNA                | 274 nts         |
| topA-R     | CATTTATAGCCTTAGTGATAGGTGTG        | 27           | RNA probe for topA antisense RNA                | 274 nts         |
| yehI-F     | GGGCATTTCTGGCGTTAAGTCTCTTTGG      | 28           | RNA probe for yehI antisense RNA                | 214 nts         |
| yehI-R     | AATTCCGCCGCTTATCACGTAAGG          | 25           | RNA probe for yehI antisense RNA                | 214 nts         |
| AygeH-F    | CGATGATCATATCTTTCAGTAC            | 22           | PCR for ygeH antisense RNA                      | 124 bp          |
| AygeH-R    | CTCACGGAAGATGGAATCTTACTCAAGG      | 29           | RT-PCR for ygeH antisense RNA                   | 124 bp          |
| ArhsE-F    | GATCCATGATTCTTTCTTTAGCTGG         | 25           | PCR for rhsE antisense RNA                      | 95 bp           |
| ArhsE-R    | GACATTTGGATCAACAATAGCTGACGTGATAGG | 33           | RT-PCR for rhsE antisense RNA, agarose Northern | 95 bp           |
| AyfjN-F    | CAAAAAGATGATCCGCTAACTC            | 22           | PCR for yfjN antisense RNA                      | 92 bp           |
| AyfjN-R    | CATTTTTATAACGGGACGGTTCCG          | 25           | RT-PCR for yfjN antisense RNA, agarose Northern | 92 bp           |
| AyiaO-F    | GATCGGGAATAAAAAACAAATACGAC        | 25           | PCR for yiaO antisense RNA                      | 87 bp           |
| AyiaO-R    | CAAATTCGATCGATGCAGTCAGAGGCGTTTTCC | 33           | RT-PCR for yiaO antisense RNA, agarose Northern | 87 bp           |
| AyjcE-F    | CAAGCAAATCGAGATCGTGCAG            | 22           | PCR for yjcE antisense RNA                      | 103 bp          |
| AyjcE-R    | GCGGCATTGCGTTCTGAACG              | 20           | RT-PCR for yjcE antisense RNA, agarose Northern | 103 bp          |
| AydiM-F    | GATCGACATAGTGATGACATGC            | 23           | PCR for ydiM antisense RNA                      | 114 bp          |
| AydiM-R    | TTAGCCAGTTATACCTTATATGG           | 23           | RT-PCR for ydiM antisense RNA                   | 114 bp          |
| AecpD-F    | CGTACGTTGACACTTTTTGATCG           | 24           | PCR for ecpD antisense RNA                      | 119 bp          |
| AecpD-R    | CATACAACAGCTTTATGCTTCGTAACC       | 27           | RT-PCR for ecpD antisense RNA                   | 119 bp          |
| AtopA-F    | CCTCCGGATCCTGCTGTGG               | 20           | PCR for topA antisense RNA                      | 101 bp          |
| AtopA-R    | GAAACGCGTGCGCCACTG                | 18           | RT-PCR for topA antisense RNA                   | 101 bp          |
| AyehI-F    | CGTCAGATCCCGTGCCGTGC              | 20           | PCR for yehI antisense RNA                      | 108 bp          |
| AyehI-R    | TGGGATCTCTTCACTGCGTGG             | 21           | RT-PCR for yehI antisense RNA                   | 108 bp          |
| RyjC-F     | AGTCATAACTGCTATTCTCCAGG           | 23           | PCR for RyjC RNA                                | 77 bp           |
| RyjC-R     | AGCGCGGTGCGGATGTGCG               | 19           | RT-PCR for RyjC RNA, agarose Northern           | 77 bp           |

| <b>Table S2: Homology scores for random and selected promoters<sup>a</sup></b>                                                                                                                                                                                                                                                                                                                                                                                                                                                                                                                                                       |                                |                         |                                          |                                      |                                 |                                     |
|--------------------------------------------------------------------------------------------------------------------------------------------------------------------------------------------------------------------------------------------------------------------------------------------------------------------------------------------------------------------------------------------------------------------------------------------------------------------------------------------------------------------------------------------------------------------------------------------------------------------------------------|--------------------------------|-------------------------|------------------------------------------|--------------------------------------|---------------------------------|-------------------------------------|
| Range of $\beta$ -galactosidase activity (MU)                                                                                                                                                                                                                                                                                                                                                                                                                                                                                                                                                                                        | Strain rank order <sup>b</sup> | Total strains per range | Number of hits per sequence <sup>c</sup> | Insert with 1 or more hits/total (%) | Highest parameter value per hit | Average of highest parameter values |
| <b>A) Random promoters</b>                                                                                                                                                                                                                                                                                                                                                                                                                                                                                                                                                                                                           |                                |                         |                                          |                                      |                                 |                                     |
| >3000                                                                                                                                                                                                                                                                                                                                                                                                                                                                                                                                                                                                                                | 1                              | 1                       | 1                                        |                                      | 60.4                            |                                     |
|                                                                                                                                                                                                                                                                                                                                                                                                                                                                                                                                                                                                                                      |                                | 1                       |                                          | 1/1 (100)                            |                                 | 60.4                                |
| 1000 to 3000                                                                                                                                                                                                                                                                                                                                                                                                                                                                                                                                                                                                                         | 2                              |                         | 3                                        |                                      | 49.7                            |                                     |
|                                                                                                                                                                                                                                                                                                                                                                                                                                                                                                                                                                                                                                      | 3                              |                         | 2                                        |                                      | 56.8                            |                                     |
|                                                                                                                                                                                                                                                                                                                                                                                                                                                                                                                                                                                                                                      | 4                              |                         | 1                                        |                                      | 63.3                            |                                     |
|                                                                                                                                                                                                                                                                                                                                                                                                                                                                                                                                                                                                                                      | 5                              |                         | 2                                        |                                      | 53.8                            |                                     |
|                                                                                                                                                                                                                                                                                                                                                                                                                                                                                                                                                                                                                                      |                                | 4                       |                                          | 4/4 (100)                            |                                 | 55.9                                |
| 300 to 1000                                                                                                                                                                                                                                                                                                                                                                                                                                                                                                                                                                                                                          | 6                              |                         | 4                                        |                                      | 49.1                            |                                     |
|                                                                                                                                                                                                                                                                                                                                                                                                                                                                                                                                                                                                                                      | 7                              |                         | 1                                        |                                      | 51.5                            |                                     |
|                                                                                                                                                                                                                                                                                                                                                                                                                                                                                                                                                                                                                                      | 8                              |                         | 2                                        |                                      | 49.1                            |                                     |
|                                                                                                                                                                                                                                                                                                                                                                                                                                                                                                                                                                                                                                      | 10                             |                         | 1                                        |                                      | 53.2                            |                                     |
|                                                                                                                                                                                                                                                                                                                                                                                                                                                                                                                                                                                                                                      | 11                             |                         | 3                                        |                                      | 51.5                            |                                     |
|                                                                                                                                                                                                                                                                                                                                                                                                                                                                                                                                                                                                                                      | 9                              |                         | 0                                        |                                      |                                 |                                     |
|                                                                                                                                                                                                                                                                                                                                                                                                                                                                                                                                                                                                                                      |                                | 6                       |                                          | 5/6 (83.3)                           |                                 | 50.9                                |
| 100 to 300                                                                                                                                                                                                                                                                                                                                                                                                                                                                                                                                                                                                                           | 12                             |                         | 1                                        |                                      | 49.1                            |                                     |
|                                                                                                                                                                                                                                                                                                                                                                                                                                                                                                                                                                                                                                      | 13                             |                         | 1                                        |                                      | 50.9                            |                                     |
|                                                                                                                                                                                                                                                                                                                                                                                                                                                                                                                                                                                                                                      | 14                             |                         | 2                                        |                                      | 57.4                            |                                     |
|                                                                                                                                                                                                                                                                                                                                                                                                                                                                                                                                                                                                                                      | 15                             |                         | 2                                        |                                      | 50.9                            |                                     |
|                                                                                                                                                                                                                                                                                                                                                                                                                                                                                                                                                                                                                                      | 17                             |                         | 1                                        |                                      | 52.7                            |                                     |
|                                                                                                                                                                                                                                                                                                                                                                                                                                                                                                                                                                                                                                      | 20                             |                         | 1                                        |                                      | 47.9                            |                                     |
|                                                                                                                                                                                                                                                                                                                                                                                                                                                                                                                                                                                                                                      | 16, 18, 19                     |                         | 0                                        |                                      |                                 |                                     |
|                                                                                                                                                                                                                                                                                                                                                                                                                                                                                                                                                                                                                                      |                                | 9                       |                                          | 6/9 (66.7)                           |                                 | 51.5                                |
| 30 to 100                                                                                                                                                                                                                                                                                                                                                                                                                                                                                                                                                                                                                            | 21                             |                         | 1                                        |                                      | 45.5                            |                                     |
|                                                                                                                                                                                                                                                                                                                                                                                                                                                                                                                                                                                                                                      | 24                             |                         | 2                                        |                                      | 49.1                            |                                     |
|                                                                                                                                                                                                                                                                                                                                                                                                                                                                                                                                                                                                                                      | 25                             |                         | 1                                        |                                      | 48.5                            |                                     |
|                                                                                                                                                                                                                                                                                                                                                                                                                                                                                                                                                                                                                                      | 26                             |                         | 1                                        |                                      | 49.7                            |                                     |
|                                                                                                                                                                                                                                                                                                                                                                                                                                                                                                                                                                                                                                      | 27                             |                         | 1                                        |                                      | 48.5                            |                                     |
|                                                                                                                                                                                                                                                                                                                                                                                                                                                                                                                                                                                                                                      | 30                             |                         | 2                                        |                                      | 51.5                            |                                     |
|                                                                                                                                                                                                                                                                                                                                                                                                                                                                                                                                                                                                                                      | 32                             |                         | 1                                        |                                      | 47.9                            |                                     |
|                                                                                                                                                                                                                                                                                                                                                                                                                                                                                                                                                                                                                                      | 34                             |                         | 2                                        |                                      | 47.9                            |                                     |
|                                                                                                                                                                                                                                                                                                                                                                                                                                                                                                                                                                                                                                      | 22, 23, 28                     |                         | 0                                        |                                      |                                 |                                     |
|                                                                                                                                                                                                                                                                                                                                                                                                                                                                                                                                                                                                                                      | 29, 31, 35                     |                         |                                          |                                      |                                 |                                     |
|                                                                                                                                                                                                                                                                                                                                                                                                                                                                                                                                                                                                                                      | 36                             |                         |                                          |                                      |                                 |                                     |
|                                                                                                                                                                                                                                                                                                                                                                                                                                                                                                                                                                                                                                      |                                | 16                      |                                          | 8/16 (50)                            |                                 | 48.6                                |
| 10 to 30                                                                                                                                                                                                                                                                                                                                                                                                                                                                                                                                                                                                                             | 42                             |                         | 1                                        |                                      | 51.5                            |                                     |
|                                                                                                                                                                                                                                                                                                                                                                                                                                                                                                                                                                                                                                      | 51                             |                         | 2                                        |                                      | 51.5                            |                                     |
|                                                                                                                                                                                                                                                                                                                                                                                                                                                                                                                                                                                                                                      | 52                             |                         | 5                                        |                                      | 51.5                            |                                     |
|                                                                                                                                                                                                                                                                                                                                                                                                                                                                                                                                                                                                                                      | 37-41                          |                         | 0                                        |                                      |                                 |                                     |
|                                                                                                                                                                                                                                                                                                                                                                                                                                                                                                                                                                                                                                      | 43-50                          |                         |                                          |                                      |                                 |                                     |
|                                                                                                                                                                                                                                                                                                                                                                                                                                                                                                                                                                                                                                      | 53-6                           |                         |                                          | 3/20 (15)                            |                                 | 51.5                                |
|                                                                                                                                                                                                                                                                                                                                                                                                                                                                                                                                                                                                                                      |                                | 20                      |                                          |                                      |                                 |                                     |
| <10                                                                                                                                                                                                                                                                                                                                                                                                                                                                                                                                                                                                                                  | 62                             |                         | 1                                        |                                      | 45.5                            |                                     |
|                                                                                                                                                                                                                                                                                                                                                                                                                                                                                                                                                                                                                                      | 63                             |                         | 1                                        |                                      | 46.7                            |                                     |
|                                                                                                                                                                                                                                                                                                                                                                                                                                                                                                                                                                                                                                      | 65                             |                         | 1                                        |                                      | 47.9                            |                                     |
|                                                                                                                                                                                                                                                                                                                                                                                                                                                                                                                                                                                                                                      | 67                             |                         | 1                                        |                                      | 46.7                            |                                     |
|                                                                                                                                                                                                                                                                                                                                                                                                                                                                                                                                                                                                                                      | 73                             |                         | 1                                        |                                      | 50.3                            |                                     |
|                                                                                                                                                                                                                                                                                                                                                                                                                                                                                                                                                                                                                                      | 74                             |                         | 1                                        |                                      | 46.1                            |                                     |
|                                                                                                                                                                                                                                                                                                                                                                                                                                                                                                                                                                                                                                      | 75                             |                         | 1                                        |                                      | 46.7                            |                                     |
|                                                                                                                                                                                                                                                                                                                                                                                                                                                                                                                                                                                                                                      | 76                             |                         | 1                                        |                                      | 46.1                            |                                     |
|                                                                                                                                                                                                                                                                                                                                                                                                                                                                                                                                                                                                                                      | 82                             |                         | 1                                        |                                      | 45.5                            |                                     |
|                                                                                                                                                                                                                                                                                                                                                                                                                                                                                                                                                                                                                                      | 84                             |                         | 1                                        |                                      | 50.3                            |                                     |
|                                                                                                                                                                                                                                                                                                                                                                                                                                                                                                                                                                                                                                      | 89                             |                         | 2                                        |                                      | 45.5                            |                                     |
|                                                                                                                                                                                                                                                                                                                                                                                                                                                                                                                                                                                                                                      | 101                            |                         | 1                                        |                                      | 46.7                            |                                     |
|                                                                                                                                                                                                                                                                                                                                                                                                                                                                                                                                                                                                                                      | 17 remaining inserts           |                         | 0                                        |                                      |                                 |                                     |
|                                                                                                                                                                                                                                                                                                                                                                                                                                                                                                                                                                                                                                      |                                | 49                      |                                          | 12/49 (24.5)                         |                                 | 47                                  |
| <b>B) Selected promoters</b>                                                                                                                                                                                                                                                                                                                                                                                                                                                                                                                                                                                                         |                                |                         |                                          |                                      |                                 |                                     |
| >5000                                                                                                                                                                                                                                                                                                                                                                                                                                                                                                                                                                                                                                | 111                            |                         | 1                                        |                                      | 50.9                            |                                     |
|                                                                                                                                                                                                                                                                                                                                                                                                                                                                                                                                                                                                                                      | 112                            |                         | 2                                        |                                      | 51.5                            |                                     |
|                                                                                                                                                                                                                                                                                                                                                                                                                                                                                                                                                                                                                                      | 113                            |                         | 3                                        |                                      | 53.2                            |                                     |
|                                                                                                                                                                                                                                                                                                                                                                                                                                                                                                                                                                                                                                      | 114                            |                         | 2                                        |                                      | 49.7                            |                                     |
|                                                                                                                                                                                                                                                                                                                                                                                                                                                                                                                                                                                                                                      | 115                            |                         | 3                                        |                                      | 56.8                            |                                     |
|                                                                                                                                                                                                                                                                                                                                                                                                                                                                                                                                                                                                                                      | 116                            |                         | 3                                        |                                      | 49.1                            |                                     |
|                                                                                                                                                                                                                                                                                                                                                                                                                                                                                                                                                                                                                                      | 117                            |                         | 2                                        |                                      | 53.2                            |                                     |
|                                                                                                                                                                                                                                                                                                                                                                                                                                                                                                                                                                                                                                      | 118                            |                         | 2                                        |                                      | 52.1                            |                                     |
|                                                                                                                                                                                                                                                                                                                                                                                                                                                                                                                                                                                                                                      |                                |                         |                                          | 8/8 (100)                            |                                 | 52.1                                |
| <p><b>a.</b> Strains were grouped according to their <math>\beta</math>-galactosidase activities and evaluated for best fit to optimal <math>\sigma_{70}</math> promoters by pftools2.2 program (Chen et al., 2003).</p> <p><b>b.</b> The strains are listed here in order of descending <math>\beta</math>-galactosidase activities except those strains in a group with no "hit" are listed at the end of the group. For strain numbers corresponding to rank orders 1-36, see Table 1. The selected promoters are listed in the same order as in Table 1.</p> <p><b>c.</b> A hit indicates a homology score of at least 45.0.</p> |                                |                         |                                          |                                      |                                 |                                     |
